# Supplementary material
Source: PubMed Central journal article supplement (PMC8436565)
Supplement: 12871_2021_1441_MOESM2_ESM.pdf [file 12871_2021_1441_MOESM2_ESM.pdf]

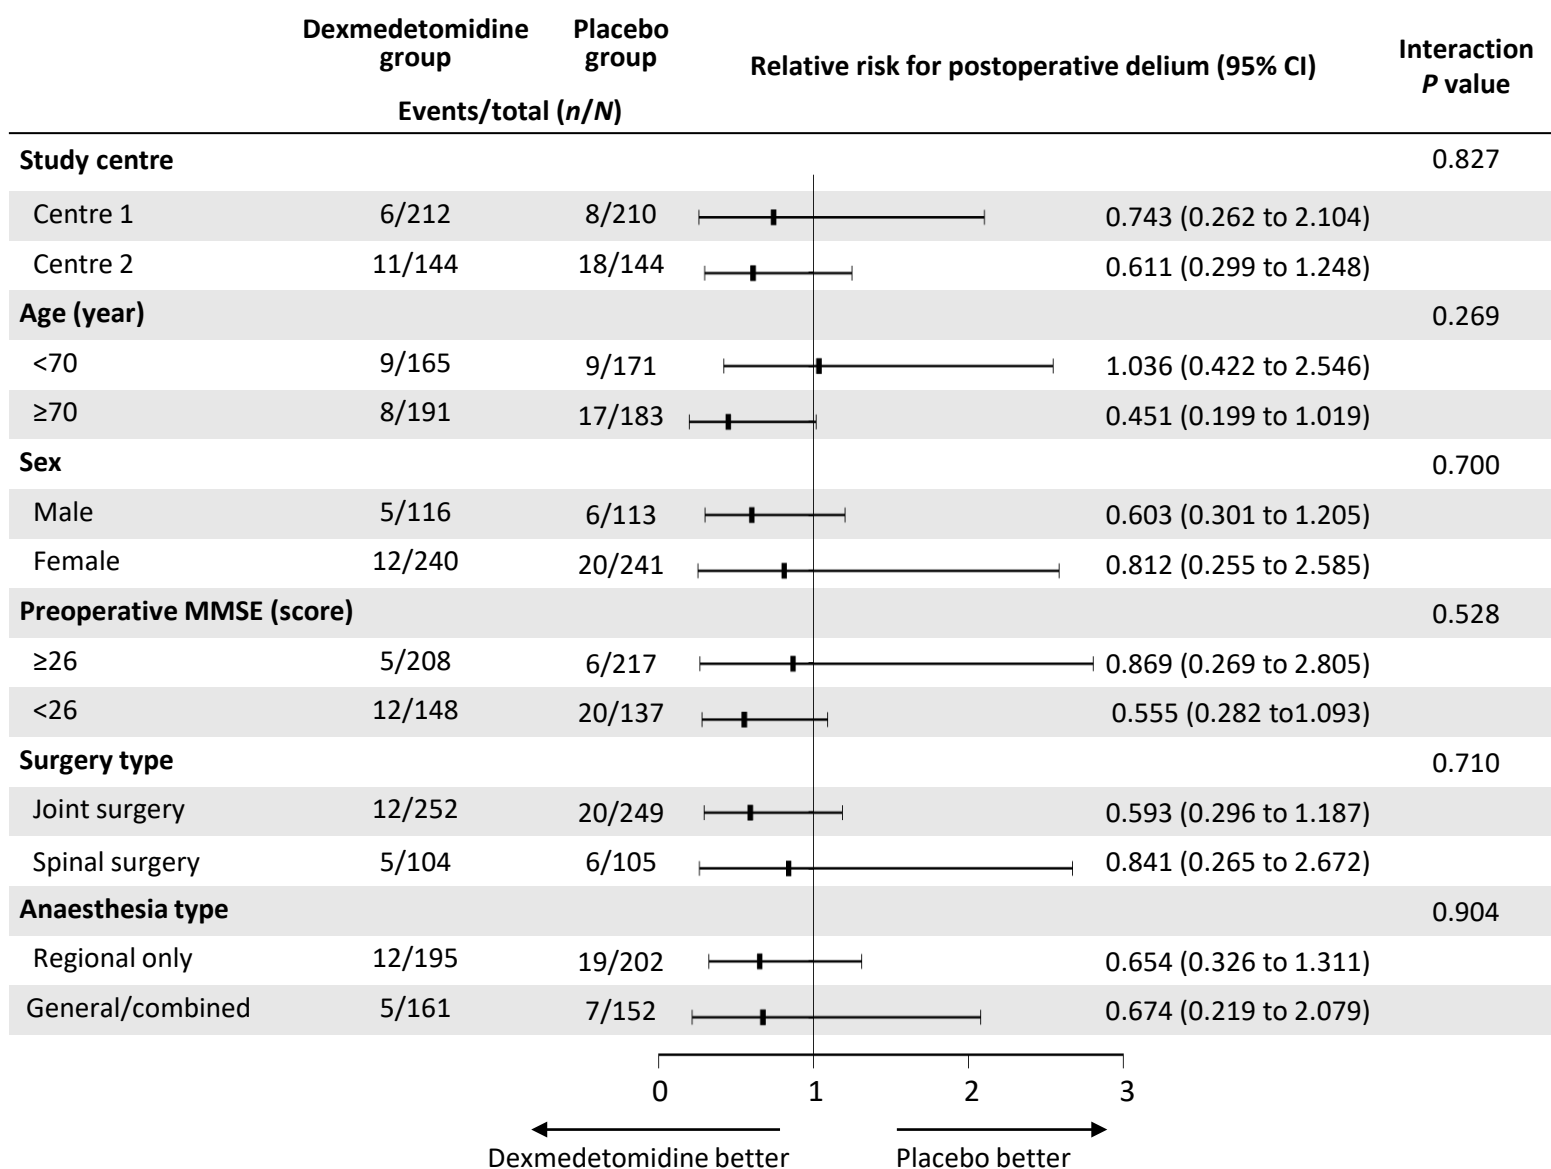

**Supplemental Figure S2.** Forest plot assessing the effect of dexmedetomidine supplemented analgesia versus placebo in predefined subgroups. The interactions between treatment effect and predefined factors were assessed separately with logistic regression models. MMSE, Mini-Mental Status Examination.
